# Supplementary material
Source: publisher site journal article supplement (https://www.kjim.org/upload/media/kjim-2021-442-suppl4.pdf)
Supplement: Supplementary file 1 [file kjim-2021-442-suppl4.pdf]

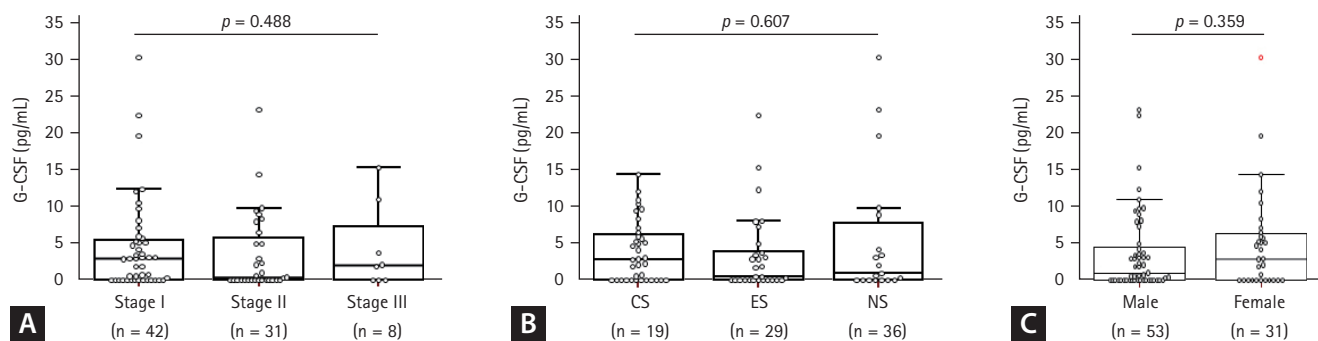

**Supplementary Figure 3.** Granulocyte colony-stimulating factor (G-CSF) protein concentrations in bronchoalveolar lavage fluid from idiopathic pulmonary fibrosis patients according to Gender-Age-Physiology (GAP) stage, smoking status, and sex. Comparisons of the G-CSF protein levels according to (A) the GAP stage, (B) smoking status, and (C) sex. Data are presented as median values with interquartile range. The normality of the distribution was tested using the Shapiro-Wilk test. Between-group comparisons were performed using the Kruskal-Wallis test and a *post hoc* Mann-Whitney *U* test. CS, current-smoker; ES, ex-smoker; NS, never-smoker.
